# Supplementary material
Source: Springer Nature journal article supplement (https://www.springermedizin.de/resource/supplementary/13049_2012_533_MOESM2_ESM.pdf/9666862)
Supplement: MOESM2 [file 9666862]

$$\text{Value} = \frac{\text{quality}}{\text{cost}}$$
